# Supplementary material
Source: PubMed Central journal article supplement (PMC6192252)

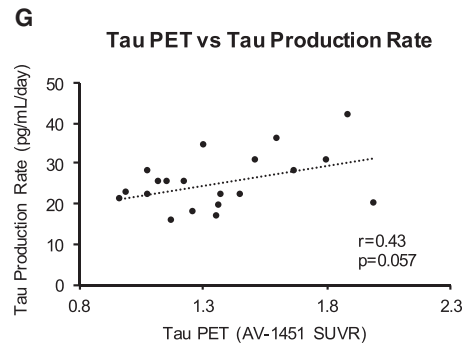

Figure S8G. Tau Kinetics Curves from 24 Participants with and without Alzheimer's Pathology (corrected)

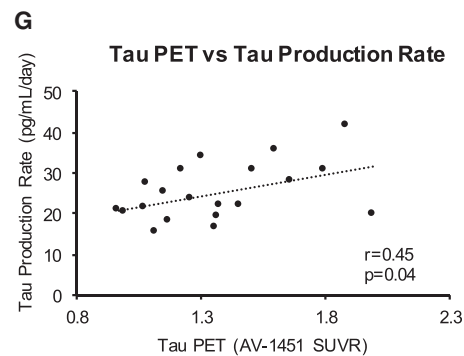

Figure S8G. Tau Kinetics Curves from 24 Participants with and without Alzheimer's Pathology (original)

## Avoiding Sibling Conflict: Lessons from Dendrite Self-Avoidance in *C. elegans*

Shelley Halpain\*

\*Correspondence: [shalpain@ucsd.edu](mailto:shalpain@ucsd.edu)

<https://doi.org/10.1016/j.neuron.2018.05.003>

(Neuron 98, 235–237; April 18, 2018)

In the original publication of this Preview, the author discussed findings that were not part of the Liao et al. (2018) paper. This has now been corrected in the Preview online. The author apologizes for this error.

© 2018 Published by Elsevier Inc.

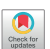

Supplement: NIHMS988026-supplement-1.pdf [file NIHMS988026-supplement-1.pdf]
